# Supplementary material for: Atmospheric Ageing of Inorganic Sea Spray Aerosol: Implications for Hygroscopicity and Cloud Activation Potential
Source: Research Square preprint supplement (doi:10.21203/rs.3.rs-127699/v1), 2020-12-21
Supplement: Supplementary file 1 [file 9cbd1e4d3a5debbbb7fba048.pdf]

## **Supporting Information:**

# Atmospheric ageing of inorganic sea spray aerosol: implications for hygroscopicity and cloud activation potential

Bernadette Rosati<sup>1,\*</sup>, Sigurd Christiansen<sup>1</sup>, Anders Dinesen<sup>1</sup>, Pontus Roldin<sup>2</sup>, Andreas Massling<sup>3</sup>, E. Douglas Nilsson<sup>4</sup>, and Merete Bilde<sup>1,\*</sup>

<sup>1</sup>Department of Chemistry, Aarhus University, DK-8000 Aarhus C, Denmark

<sup>2</sup>Division of Nuclear Physics, Lund University, SE-22100 Lund, Sweden

<sup>3</sup>Department of Environmental Science, University of Aarhus, DK-4000 Roskilde, Denmark

<sup>4</sup>Department of Environmental Science, Stockholm University, SE-11418 Stockholm, Sweden

\*Corresponding Authors: bernadette.rosati@chem.au.dk, bilde@chem.au.dk

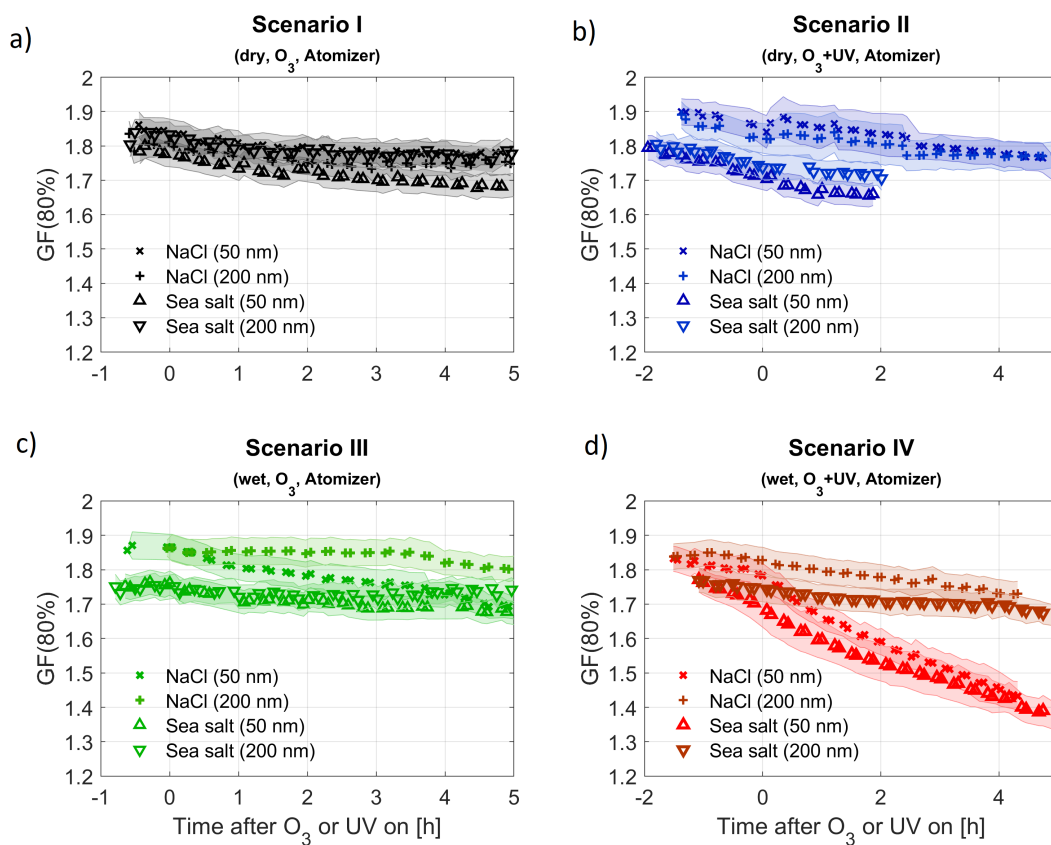

Figure S1: Experiments with Atomiser: Growth factor (GF) measured at RH=80% for NaCl and sea salt for the two different sizes of  $D_{dry}$ =50 nm and 200 nm. a) Scenarios I; b) Scenario II; c) Scenario III; d) Scenario IV. The 0-time-point marks the exposure start time to  $O_3$  or OH. During  $t < 0$ , no oxidant was present in scenarios I and III, while particles together with  $O_3$  were present in the scenarios II and IV.

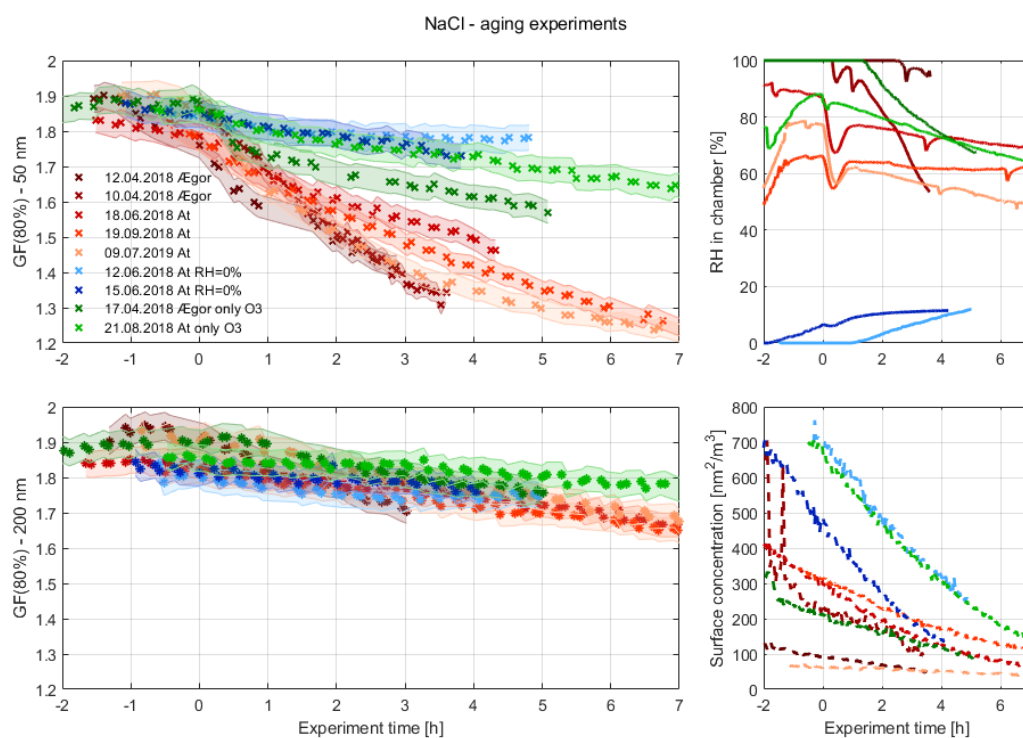

Figure S2: NaCl experiments: GF(80%) for  $D_{\text{dry}}=50$  nm and 200 nm are shown for each experiment in each of the scenarios, where "At" stands for atomiser and "Ægor" for experiments using the sea spray simulation tank. The experiments illustrate ageing by exposure to  $O_3$  and UV lights, except where otherwise stated in the legend. Additionally, the RH in the chamber and the surface concentration in the chamber are illustrated.

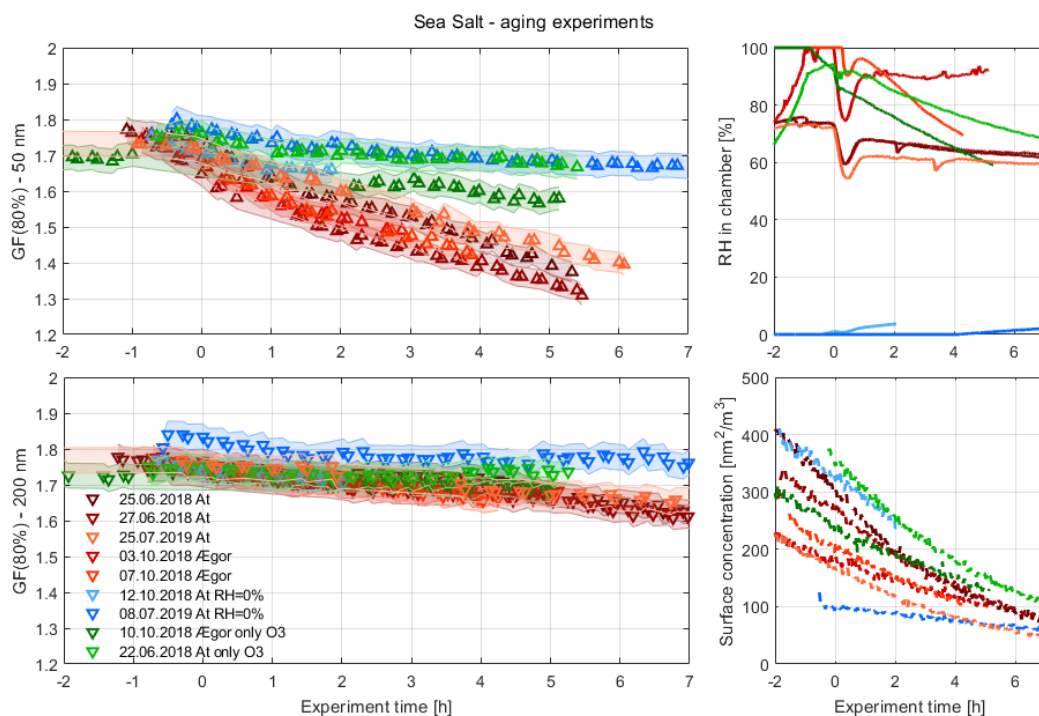

Figure S3: Sea salt experiments: GF(80%) for  $D_{\text{dry}}=50$  nm and 200 nm are shown for each experiment in each of the scenarios, where "At" stands for atomiser and "Ægor" for experiments using the sea spray simulation tank. The experiments illustrate ageing by exposure to  $O_3$  and UV lights, except where otherwise stated in the legend. Additionally, the RH in the chamber and the surface concentration in the chamber are illustrated.

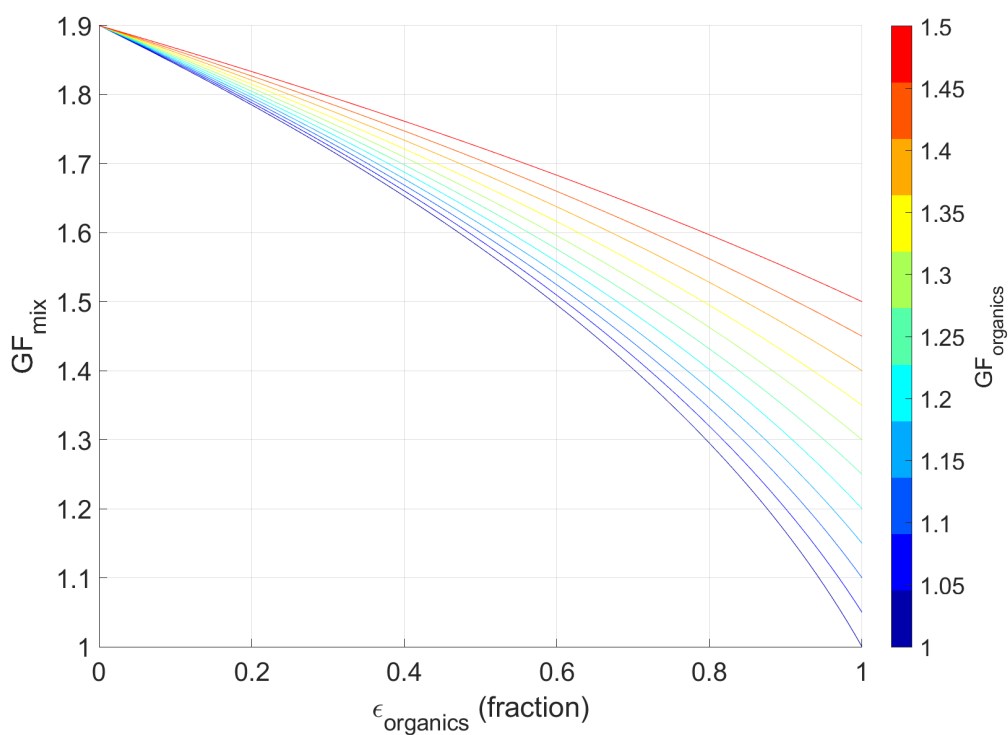

Figure S4: Calculation, using a volume weighted mixing rule (ZSR), of the mixed hygroscopic growth factor (GF) assuming a  $GF_{inorganic}$  of 1.9 (NaCl) at RH=80% and a varying  $GF_{organic}$  from 1-1.5 (colour code). The x-axis denotes the organic volume fraction ( $\epsilon_{organic}$ ) while the y-axis shows the mixed GF ( $GF_{mix}$ ).

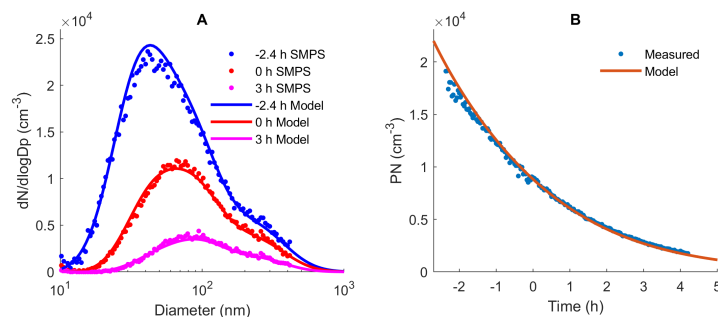

Figure S5: ADCHAM Exp. 7: Panel A: Particle number size distributions at different times of the experiment. Markers show experimental data while lines show modelled data. Panel B: Particle number concentration (PN) as a function of experimental time from experimental and modelled data.

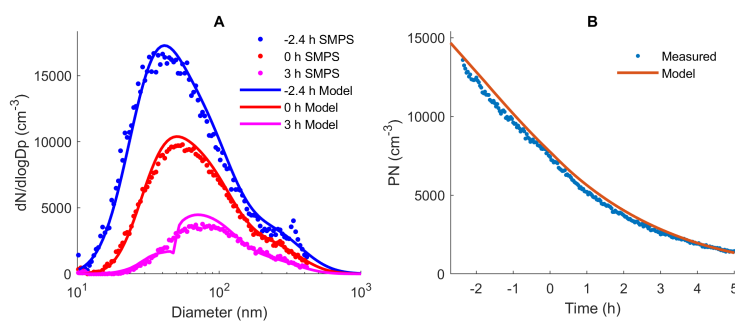

Figure S6: ADCHAM Exp. 8: Panel A: Particle number size distributions at different times of the experiment. Markers show experimental data while lines show modelled data. Panel B: Particle number concentration (PN) as a function of experimental time from experimental and modelled data.

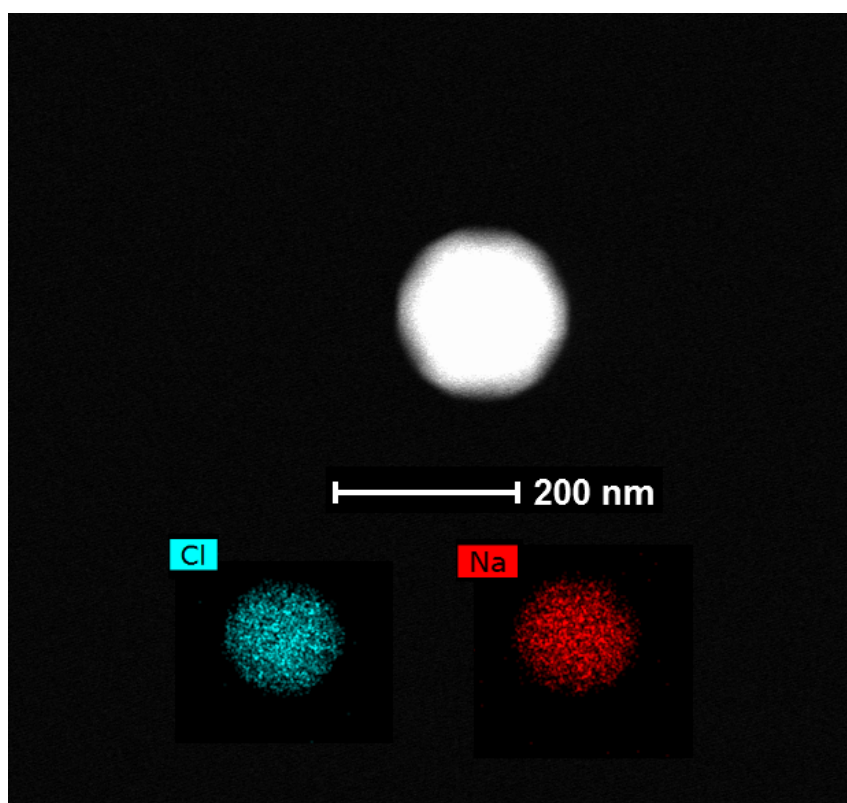

Figure S7: Microscopy (STEM) picture of aged NaCl particle after treatment with a thermodenuder (set at 300°C). Only Na and Cl were found inside this particle. See main manuscript for more information.

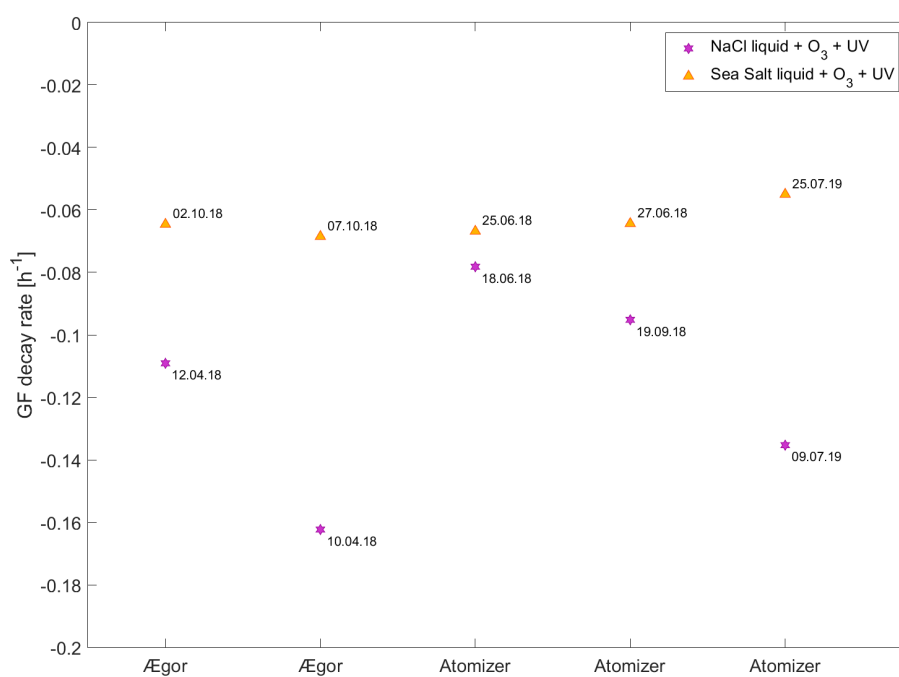

Figure S8: Growth factor decay rates for  $D_{\text{dry}}=50$  nm separated for NaCl and sea salt corresponding to values presented in Table 1.



# 1 ADCHAM model simulations:

In order to investigate the processes behind the observed particle number size distribution evolution during the AURA experiments we setup the Aerosol Dynamics gas- and particle-phase chemistry model for laboratory CHAMber studies (ADCHAM)<sup>(1;2)</sup>. The model was setup for one dry (Exp. 7) and one humid (Exp. 8) experiment with initially pure NaCl particles aged in the presence of O<sub>3</sub> and UV light. In the humid experiments (RH ranging between 68 % and 92 %) the salt particles were assumed to be well mixed liquid water droplets. In the dry experiments (RH ranging between 0 % and 12 %) the particles were instead assumed to be solid crystalline salt particles. The initial NO<sub>x</sub> concentration was estimated to be 1 ppb<sub>v</sub> based on the NO<sub>x</sub> observations in AURA. The measured temperature and RH time series were used as input to the model. The only condensable/evaporating species considered in the model simulations were HCl, HNO<sub>3</sub>, H<sub>2</sub>SO<sub>4</sub> and NH<sub>3</sub>. The modelled particle number size distribution was represented by 100 fixed size bins in the size range 10 nm to 1.37 μm in diameter. The initial particles were assumed to be composed of pure NaCl. The initial particle number size distribution were estimated based on the observed particle number size distribution from the SMPS. The particle wall losses were modelled considering the particle wall deposition of charged and non-charged particles using the particle wall loss parameterizations described in Roldin et al<sup>(1)</sup>. The key unknown parameters in these parameterizations are the electric field strength inside the chamber and the friction velocity. For the simulations performed in this work we used an electric field strength of 1.0 V/cm and a friction velocity of 0.03 m/s. The model also simulated the gradual dilution of the smog chamber because of the instrument sampling and air entrainment from outside the chamber. The Teflon bag in AURA is mounted in a fixed metal frame. Based on the observations of the smog chamber we estimate that the chamber volume can be compressed from initially 5 m<sup>3</sup> to a minimum volume of 3 m<sup>3</sup> because of the instrument sampling. In the model we simulate this compaction and gradually increasing air entrainment using a simplified parameterization which describe the fraction of the sampled air which result in a decreasing chamber volume:

$$f_{\text{compaction}} = (V(t) - V_{\text{min}})/(V_0 - V_{\text{min}}) \quad (1.1)$$

( $V(t)$ ), ( $V_{\text{min}}$ ) and ( $V_0$ ) denote the chamber volume at time ( $t$ ), the estimated minimum chamber volume (3 m<sup>3</sup>) in AURA and the initial chamber volume (5 m<sup>3</sup>) respectively.

The remaining fraction of the sampled air ( $1 - f_{\text{compaction}}$ ) was assumed to be particle free air mixed into the chamber from outside resulting in a gradual dilution of the chamber volume.

### *1 ADCHAM model simulations:*

Figure S5- S6 shows the modelled and observed particle number size distributions and total particle number concentration for Exp. 7 and 8. The close agreement between the modelled and observed particle number size distribution and total particle number concentrations during both experiments show that the particle number size distribution and particle number concentration evolution during the AURA experiments are mainly governed by coagulation, particle wall losses and gradual dilution of the chamber because of the instrument sampling which was 15 lpm.

## Bibliography

- [1] P. Roldin, A. C. Eriksson, E. Z. Nordin, E. Hermansson, D. Mogensen, A. Rusanen, M. Boy, E. Swietlicki, B. Svenningsson, A. Zelenyuk, and J. Pagels. Modelling non-equilibrium secondary organic aerosol formation and evaporation with the aerosol dynamics, gas- and particle-phase chemistry kinetic multilayer model adcham. *Atmospheric Chemistry and Physics*, 14(15):7953–7993, 2014. doi: 10.5194/acp-14-7953-2014. URL <https://www.atmos-chem-phys.net/14/7953/2014/>.
- [2] P. Roldin, E. Mikael, T. Kurtén, T. Olenius, M. P. Rissanen, N. Sarnela, J. Elm, P. Rantala, L. Hao, N. Hyttinen, L. Heikkinen, D. R. Worsnop, L. Pichelstorfer, C. Xavier, P. Clusius, E. Öström, T. Petäjä, M. Kulmala, H. Vehkamäki, A. Virtanen, I. Riipinen, and M. Boy. The role of highly oxygenated organic molecules in the boreal aerosol-cloud-climate system. *Nature Communications*, 10:4370, 2019. doi: <https://doi.org/10.1038/s41467-019-12338-8>.
